# Supplementary material for: Influence of alkali metals on Pd/TiO2catalysts for catalytic oxidation of formaldehyde at room temperature
Source: Royal Society of Chemistry journal article supplement (doi:10.1039/c5cy01521a), 2015-11-26

**Table S1.** The conditions of TOF measurement for Pd/TiO<sub>2</sub> and alkali doped Pd/TiO<sub>2</sub> catalysts.

| Sample                 | Inlet HCHO<br>Concentration<br>/ppm | Catalyst weight<br>/mg | GHSV<br>/h <sup>-1</sup> | HCHO<br>conversion<br>/% |
|------------------------|-------------------------------------|------------------------|--------------------------|--------------------------|
| Pd/TiO <sub>2</sub>    | 320                                 | 60                     | 98000                    | 10.1                     |
| Li-Pd/TiO <sub>2</sub> | 350                                 | 60                     | 98000                    | 13.0                     |
| Na-Pd/TiO <sub>2</sub> | 350                                 | 9                      | 650000                   | 10.3                     |
| K-Pd/TiO <sub>2</sub>  | 890                                 | 9                      | 650000                   | 25.0                     |
| Cs-Pd/TiO <sub>2</sub> | 780                                 | 9                      | 650000                   | 14.0                     |

Figure S1. C 1s XPS of samples

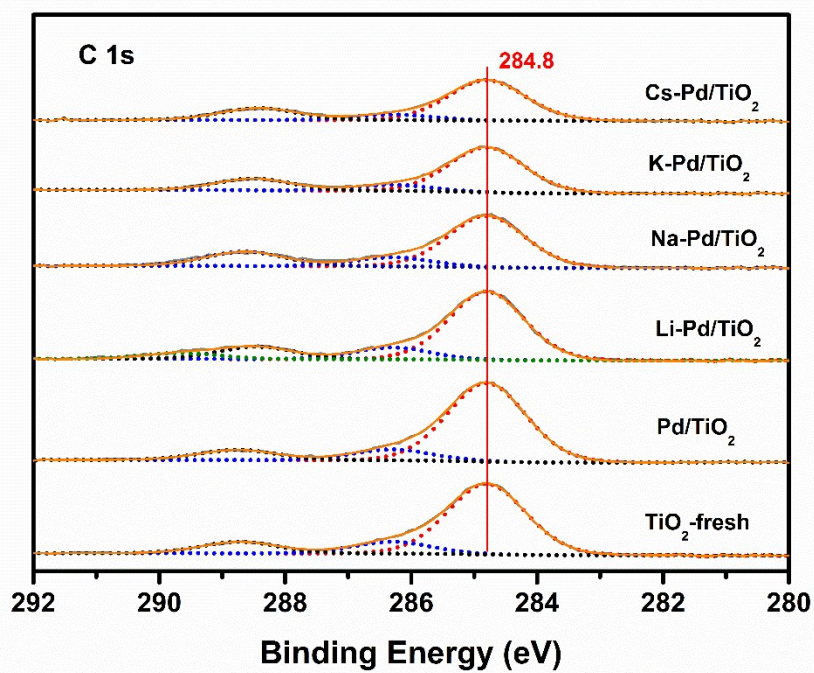

**Figure S2.** TEM images of a) Pd/TiO<sub>2</sub>; b) Li-Pd/TiO<sub>2</sub>; c) Na-Pd/TiO<sub>2</sub>; d) K-Pd/TiO<sub>2</sub>;

e) Cs-Pd/TiO<sub>2</sub> and HR-TEM image of f) Na-Pd/TiO<sub>2</sub>

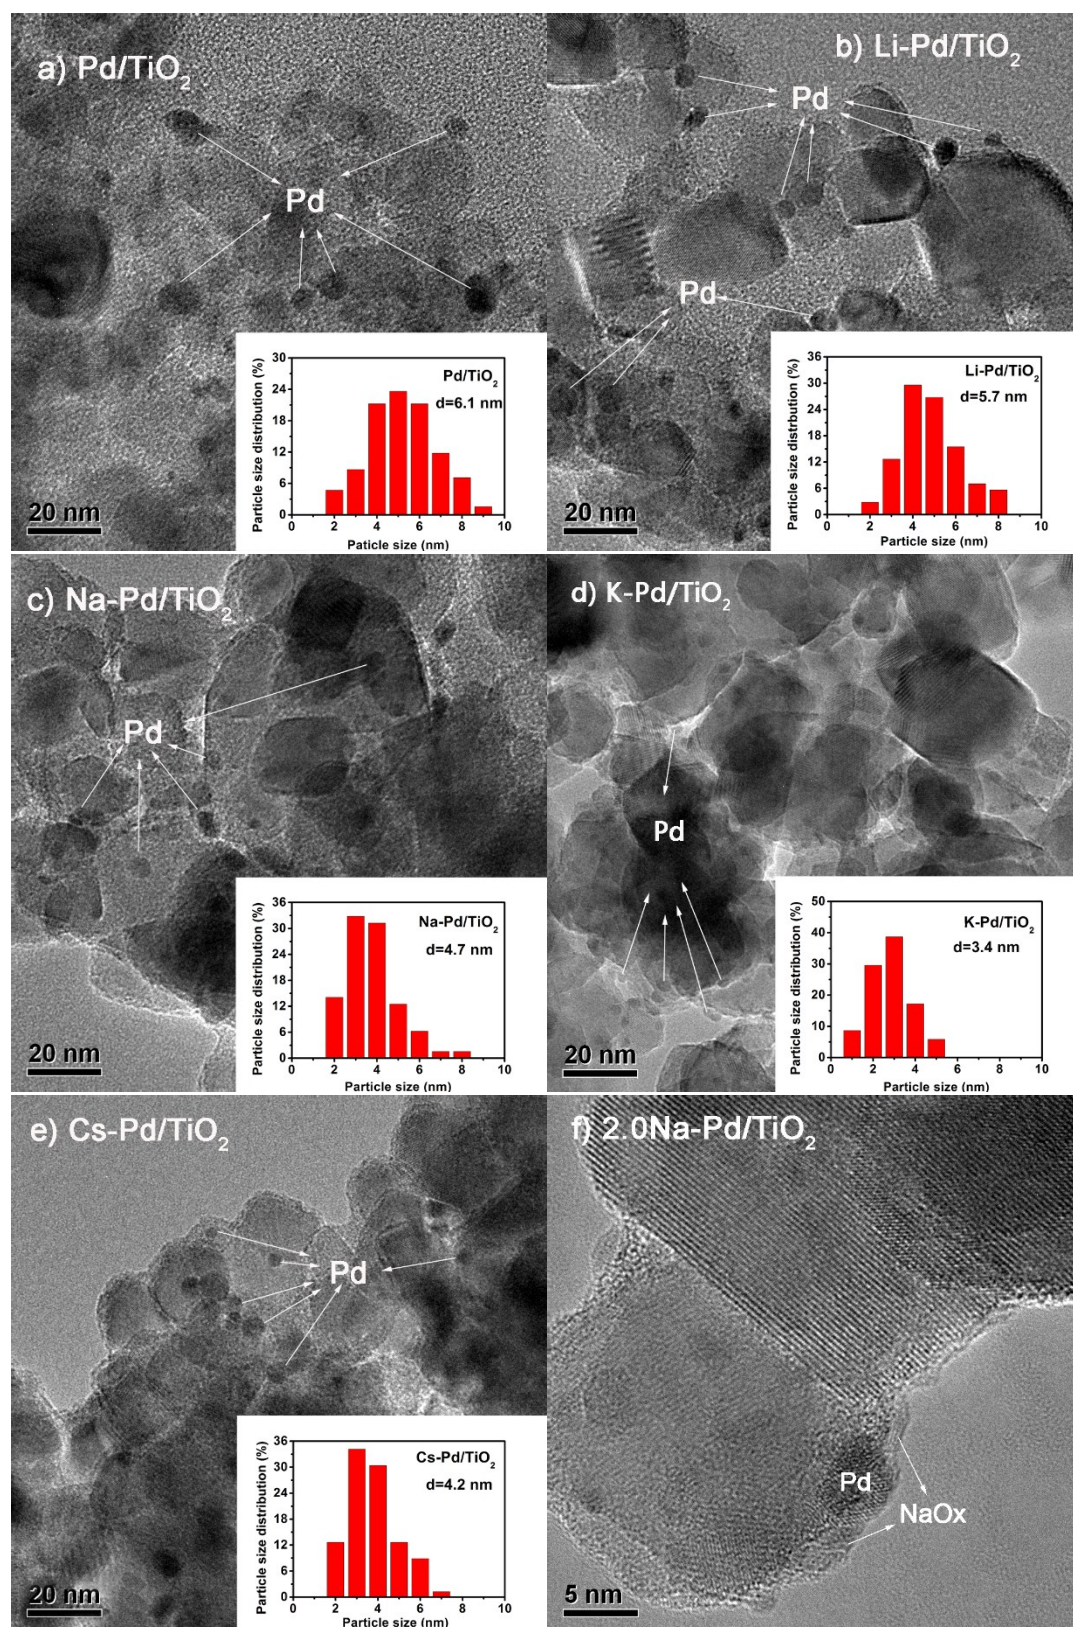

Supplement: c5cy01521a1.pdf [file c5cy01521a1.pdf]
